# Supplementary material for: Use of mercaptophenylboronic acid functionalized gold nanoparticles in a sensitive and selective dynamic light scattering assay for glucose detection in serum
Source: Royal Society of Chemistry journal article supplement (doi:10.1039/c3an00645j), 2013-01-01
Supplement: c3an00645j.pdf [file c3an00645j.pdf]

## **Supplementary Information (ESI)**

### **Use of mercaptophenylboronic acid functionalized gold nanoparticles in a sensitive and selective dynamic light scattering assay for glucose detection in serum**

Qing Wang, Liyan Yang, Xiaohai Yang, Kemin Wang,\* Jianbo Liu

*State Key Laboratory of Chemo/Biosensing and Chemometrics, College of Chemistry and Chemical Engineering, Key Laboratory for Bio-Nanotechnology and Molecular Engineering of Hunan Province, Hunan University, Changsha 410082, China*

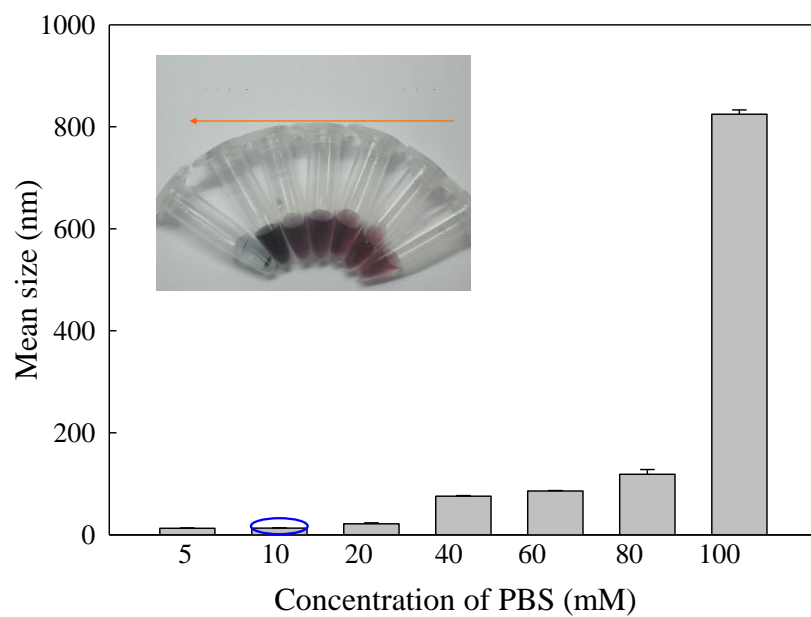

**Fig. S1** The effect of ion concentration on the average diameters of MPBA-AuNPs.

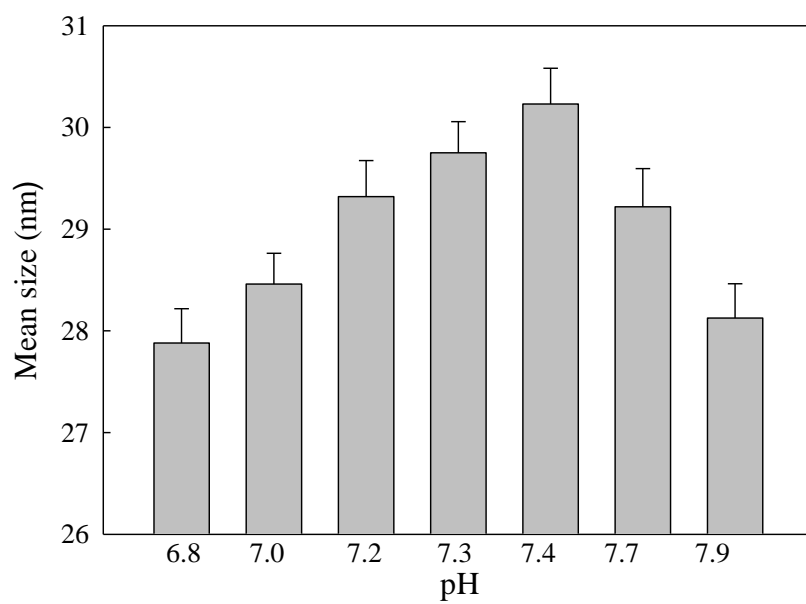

**Fig. S2** The effect of pH in 10 mM PBS solution on the average diameters of MPBA-AuNPs.

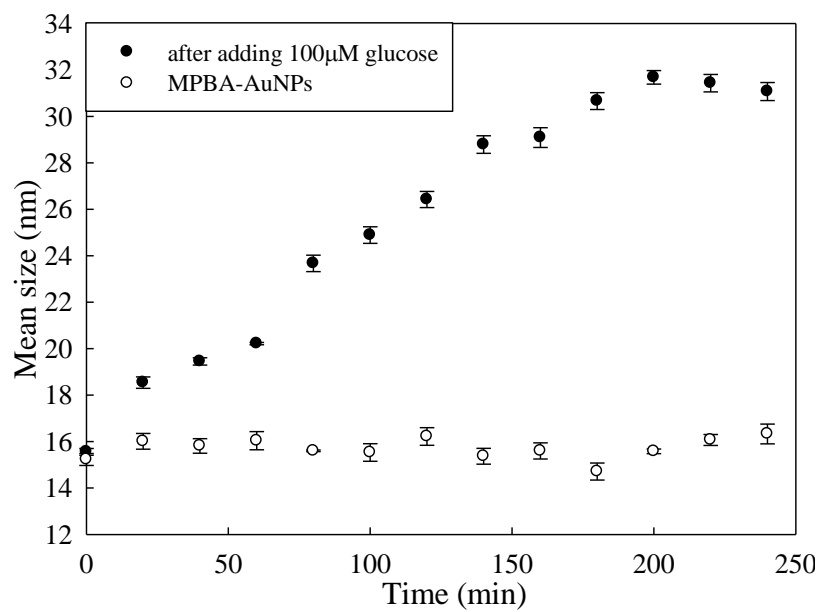

**Fig. S3** The change of average diameters of particles corresponding to different reaction time. Concentration of glucose: 100  $\mu$ M; buffer: 10 mM PBS (pH = 7.4).

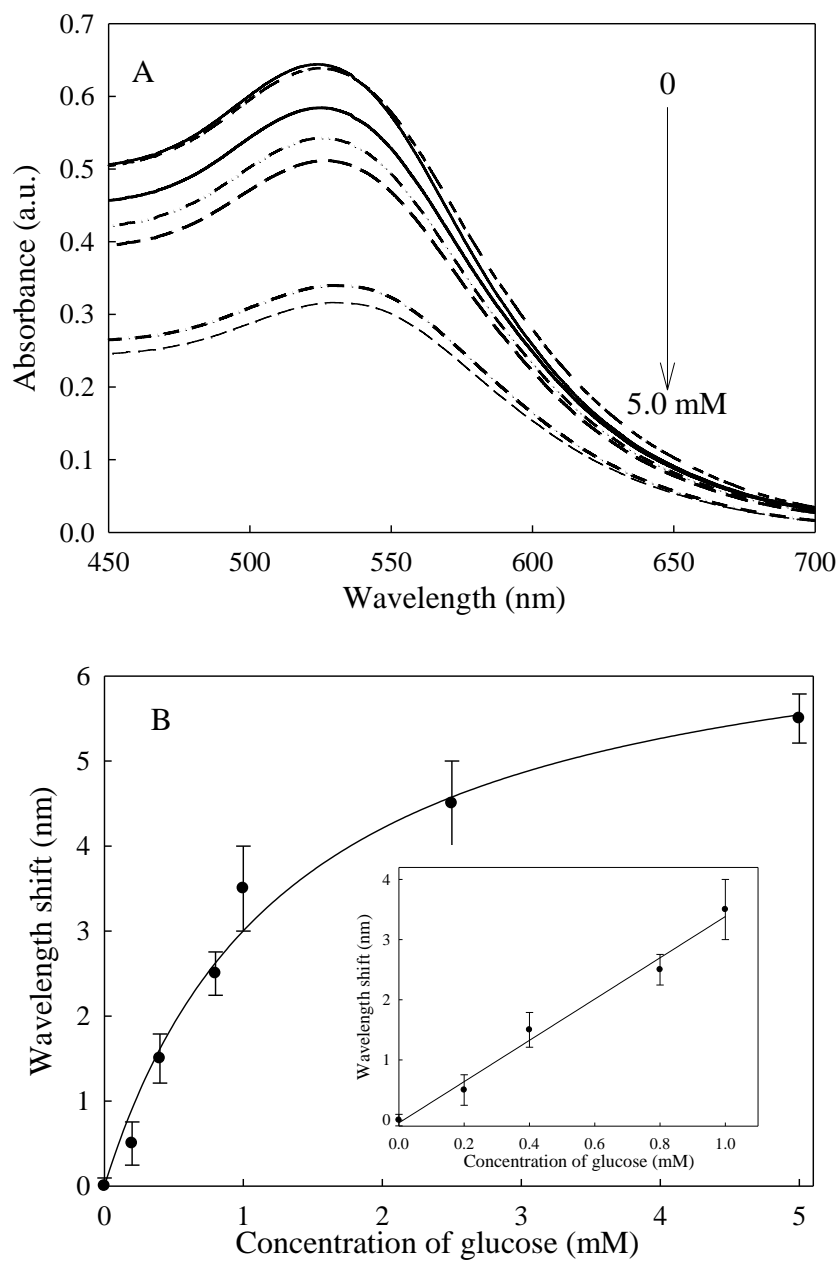

**Fig. S4** (A) Absorbance spectra of MPBA-AuNPs solution before and after the addition of different concentration of glucose. (B) Quantification of glucose concentration using UV-Vis spectra.
